# Supplementary figures and images for: Acute effects of the food preservative propionic acid on glucose metabolism in humans
Source: PubMed Central journal article supplement — BMJ Open Diabetes Res Care. 2021 Jul 26;9(1):e002336. doi: 10.1136/bmjdrc-2021-002336 (PMC8314753; doi:10.1136/bmjdrc-2021-002336), 2021-07-26

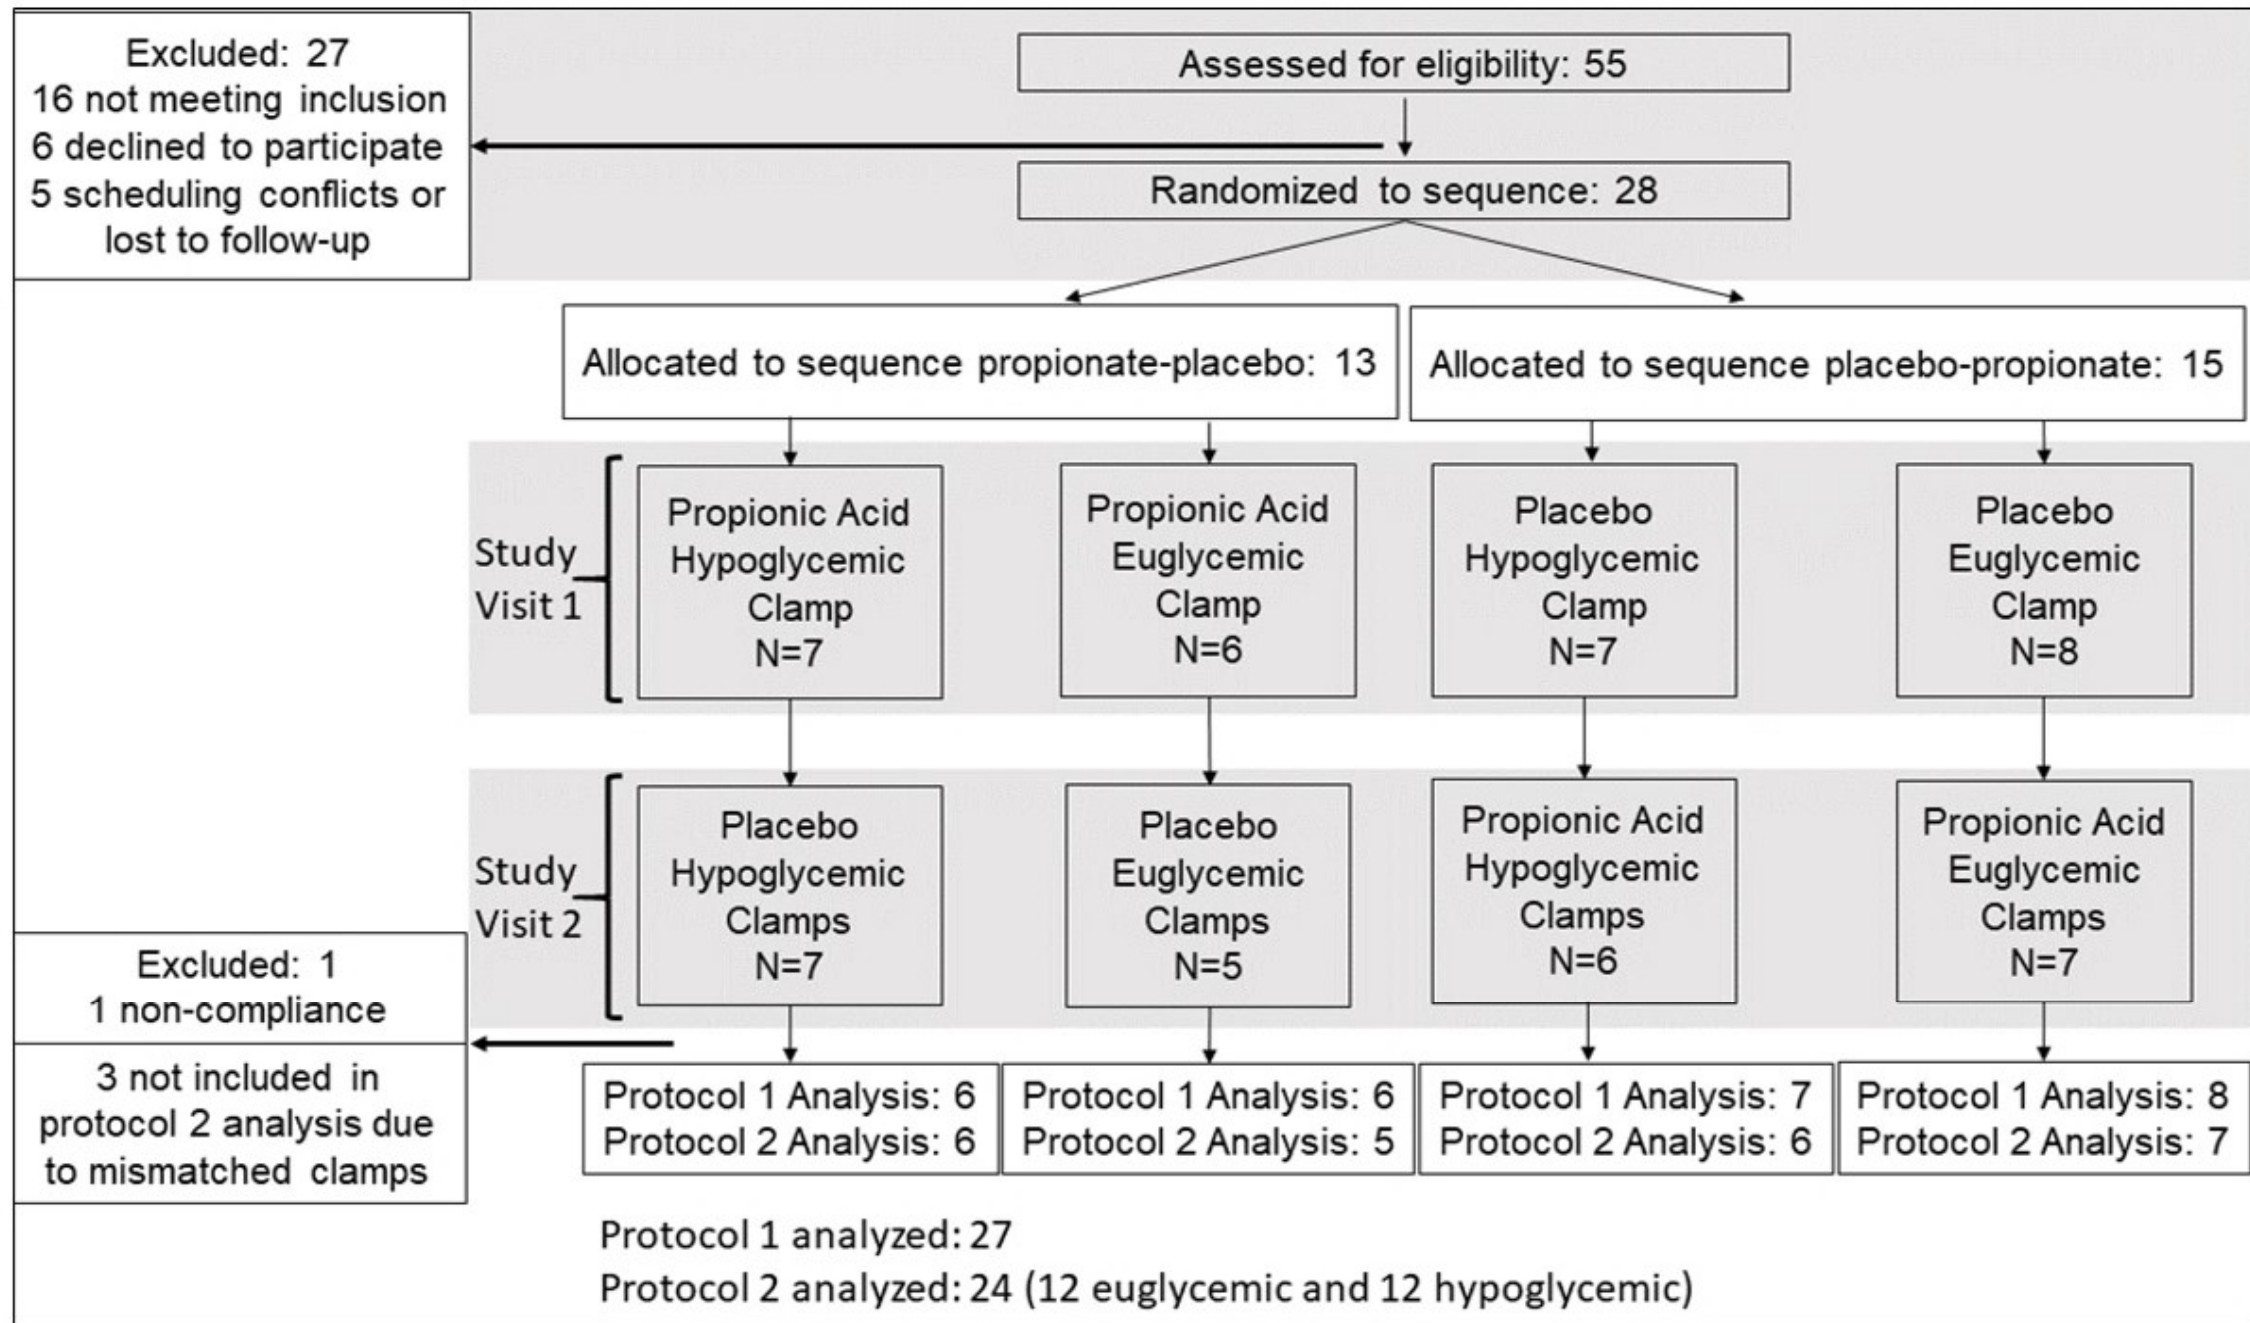

Figure S1 – Consort diagram of healthy volunteers through the study protocol.

Supplement: bmjdrc-2021-002336supp001.pdf [file bmjdrc-2021-002336supp001.pdf]
